# Supplementary material for: Benchmarking of SpCas9 variants enables deeper base editor screens of BRCA1 and BCL2
Source: PubMed Central journal article supplement (PMC8921519; doi:10.1038/s41467-022-28884-7), 2022-03-14
Supplement: 41467_2022_28884_MOESM4_ESM.pdf [file 41467_2022_28884_MOESM4_ESM.pdf]

**Title:** Supplementary Data 1:

**Description:** PAM-mapping counts, library annotation, replicate correlations. Associated with Figs 1,3.

**Title:** Supplementary Data 2:

**Description:** HF-off-target counts, library annotation, replicate correlations. Associated with Fig 2.

**Title:** Supplementary Data 3:

**Description:** variant off-target counts, library annotation, replicate correlations. Associated with Fig 4.

**Title:** Supplementary Data 4:

**Description:** LFC and probability of being active calculations for all of the off-target datasets that are used to calculate the CFD scores. Associated with Figs 2,4.

**Title:** Supplementary Data 5:

**Description:** BRCA1 CBE data - WT, NG, SpG counts, WT library annotation (includes different controls), variant library annotation, replicate correlations. Associated with Fig 5.

**Title:** Supplementary Data 6:

**Description:** BRCA1 ABE data - WT, NG, SpG counts, WT library annotation (includes different controls), variant library annotation, replicate correlations. Associated with Fig 5.

**Title:** Supplementary Data 7:

**Description:** BCL2 data - NG-CBE and NG-ABE counts, library annotations, replicate correlations. Associated with Fig 7.

**Title:** Supplementary Data 8:

**Description:** Primers and guide sequences used for validation experiments and the parameters used to run all validation samples in CRISPResso2. Associated with Figs 6,7.
